# Supplementary material
Source: PubMed Central journal article supplement (PMC2575336)
Supplement: 0800790105_0800790105SI.pdf [file 0800790105_0800790105SI.pdf]

# Supporting Information

Charrassin *et al.* 10.1073/pnas.0800790105

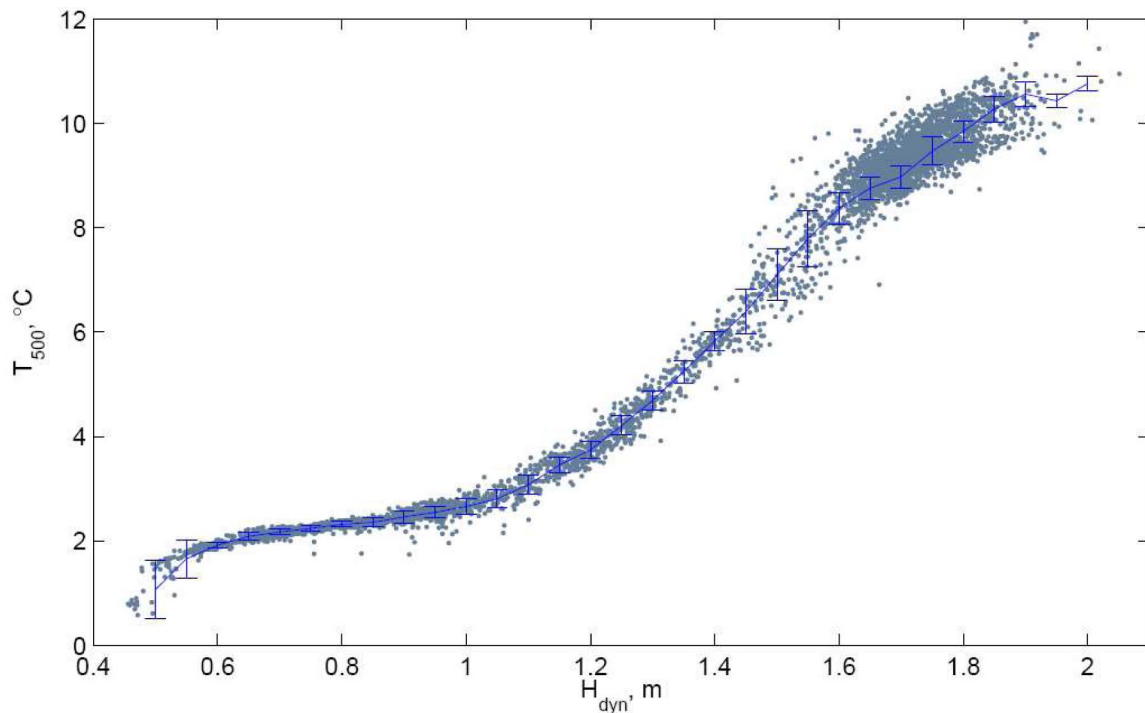

**Fig. S1.** Temperature at 500 m versus dynamic height at sea surface relative to 1,500 m, using data from Argo floats between 90°E and 150°E. The error bars indicate the temperature error related to the mapping of Argo profiles on SSH field. The circumpolar-mean temperature errors translate to a typical uncertainty of 0.043 m in dynamic height. This error can be translated into an error in locating the fronts by multiplying by (the inverse) dynamic height gradient. The resulting mean spatial error in mapping the fronts using the temperature-dynamic height relationship is  $31 \pm 18$  km. This estimate using the mean SSH gradients is an upper bound of the mapping error resulting from use of synoptic SSH fields, because the instantaneous SSH gradients are larger and would result in smaller mapping errors.

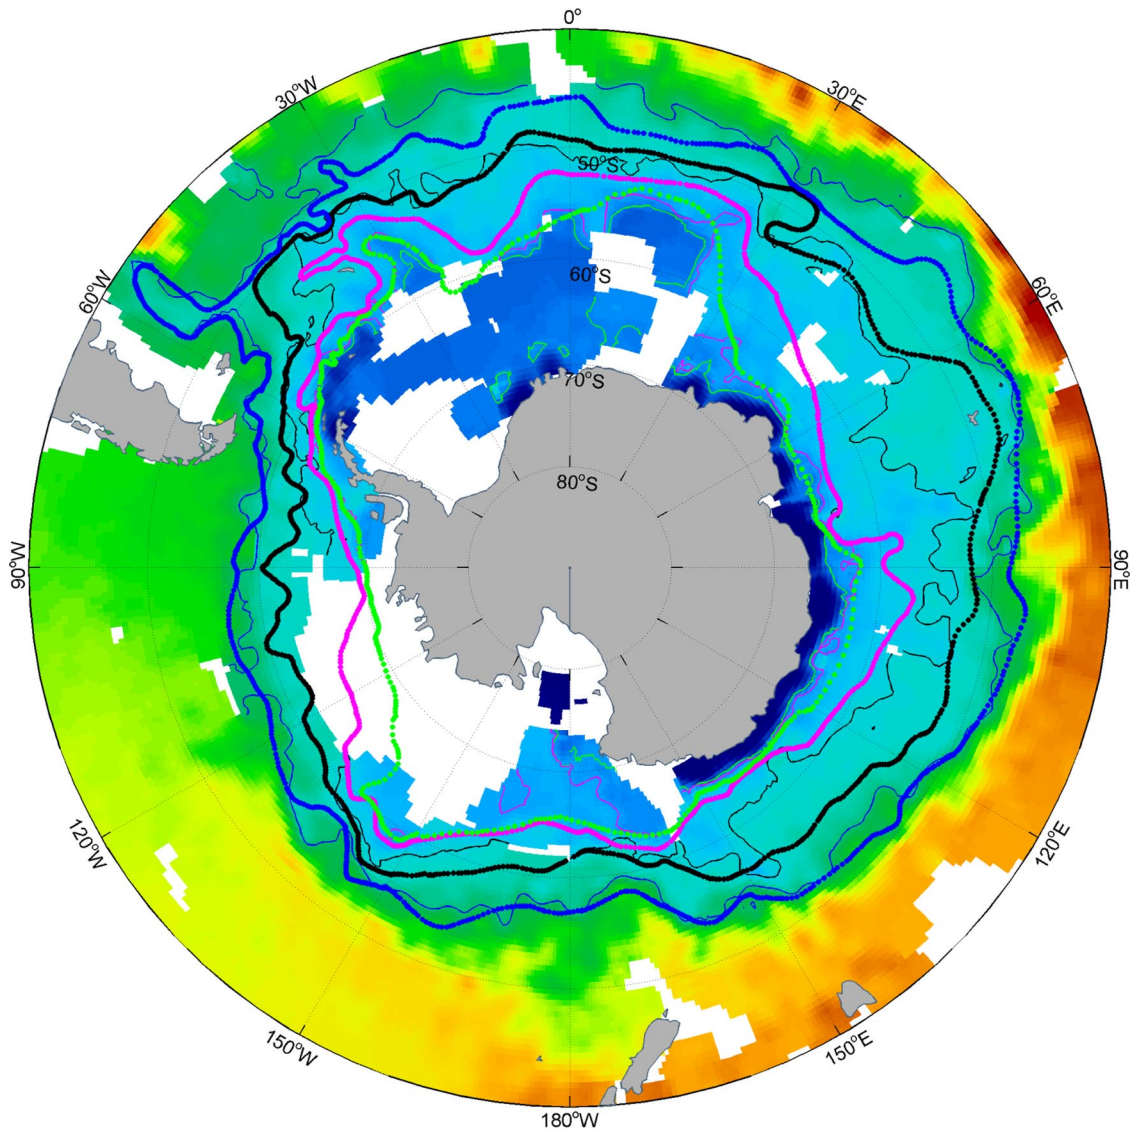

- |                              |                          |
|------------------------------|--------------------------|
| From seal and Coriolis data: | From Orsi et al. (1995): |
| — Bdy                        | — Bdy                    |
| — sACCF                      | — sACCF                  |
| — PF                         | — PF                     |
| — SAF                        | — SAF                    |

Fig. S2. Temperature field at 500 m during 2004–2005 from the merged Coriolis and elephant seal databases. Mean front positions during 2004–2005 derived from Coriolis and seal data (thin lines), and from climatology [Orsi AH, Whitworth T, Nowlin WD (1995) *Deep-Sea Res* 42:641–673] (thick lines). For Coriolis and seal data, plotted fronts are Bdy, southern branch of sACCF, and central branches of PF and SAF.

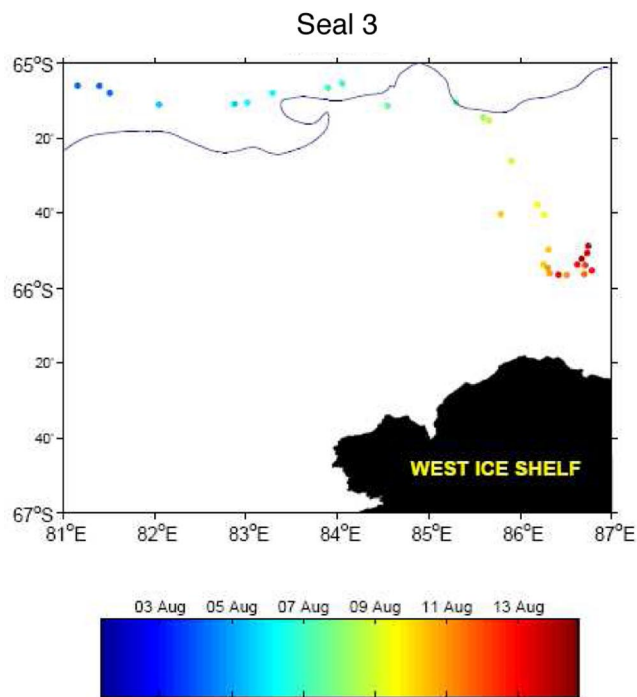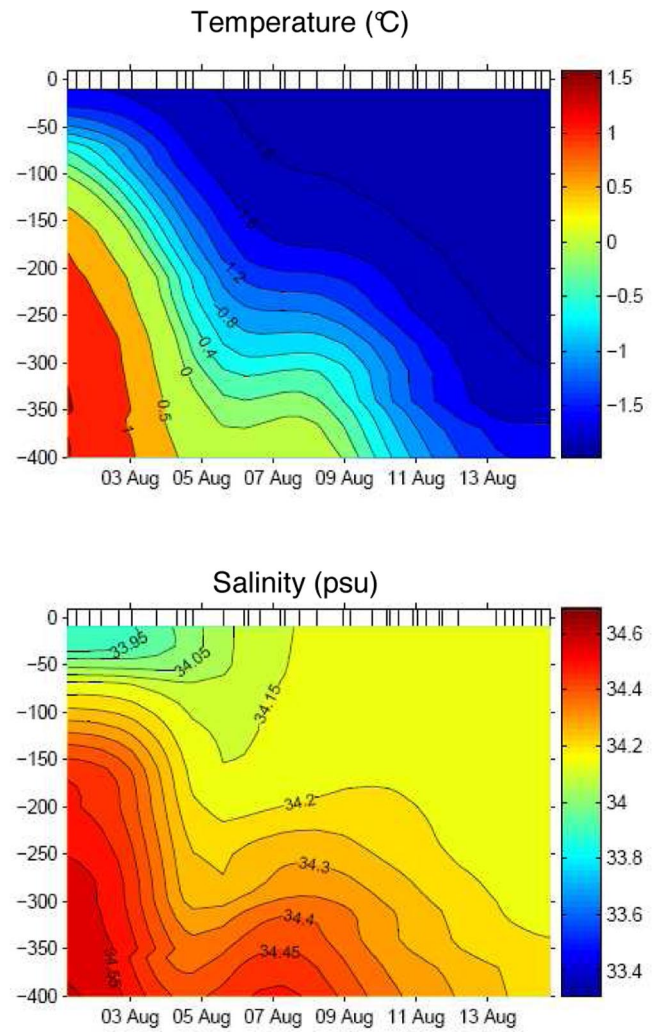

**Fig. S3.** Temperature and salinity measured by seal 3 in August 2004 near 84°E (indicated by a yellow star in Fig. 1B and by black dots in Fig. 3A); tick marks on top of sections indicate the timing of individual profiles.

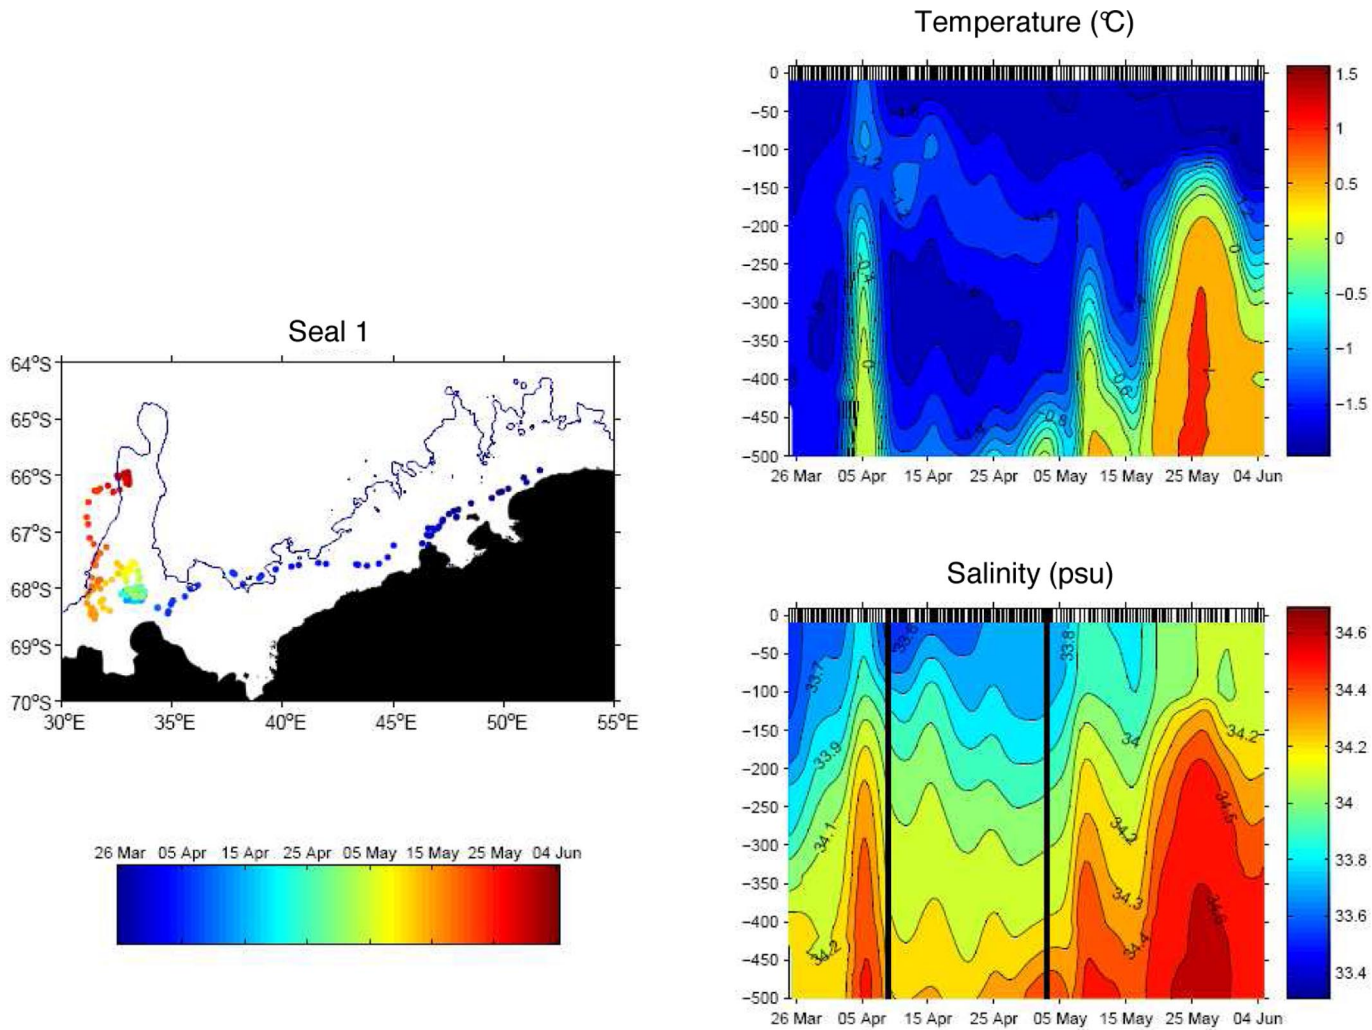

**Fig. S4.** T and S measured by seal 1 in April–May 2004 near 34°E (indicated by a blue star in Fig. 1B). Tick marks on top of sections indicate the timing of individual profiles. Heavy vertical lines on salinity plot indicate the period used to calculate ice formation rates from the salinity budget.

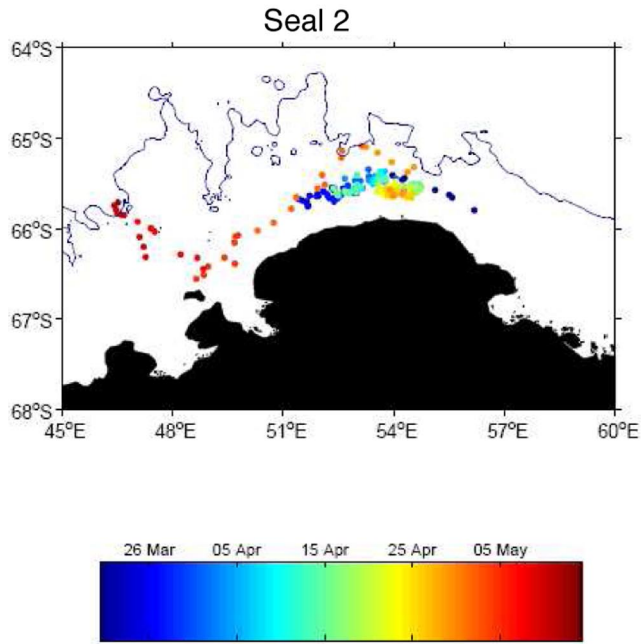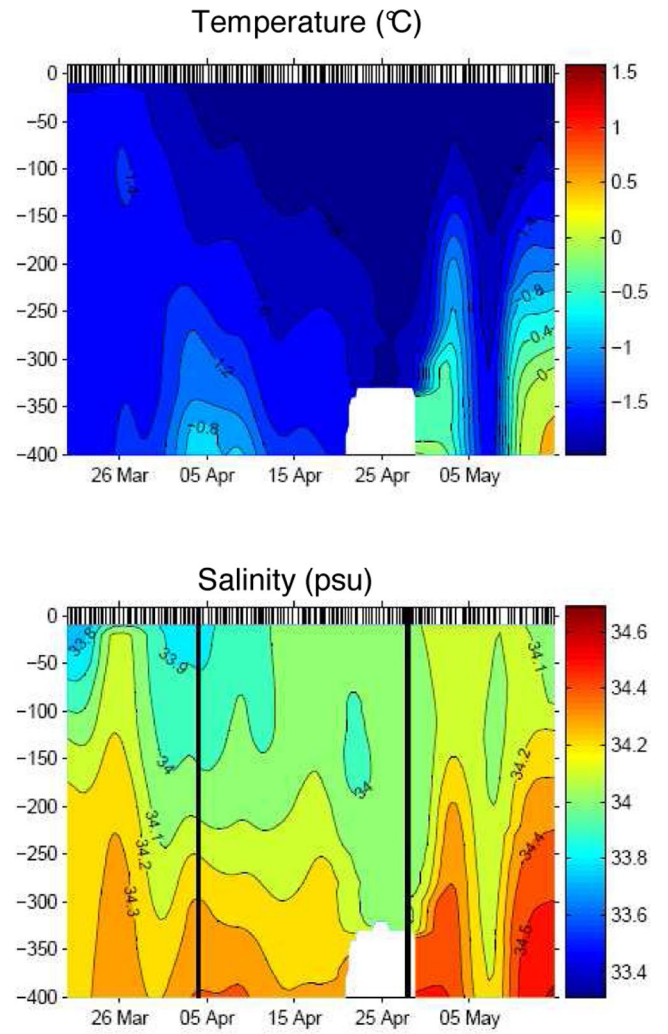

**Fig. S5.** T and S measured by seal 2 in March–May 2004 near 54°E (indicated by a white star in Fig. 1B). Tick marks on top of sections indicate the timing of individual profiles. Heavy vertical lines on salinity plot indicate the period used to calculate ice formation rates from the salinity budget.

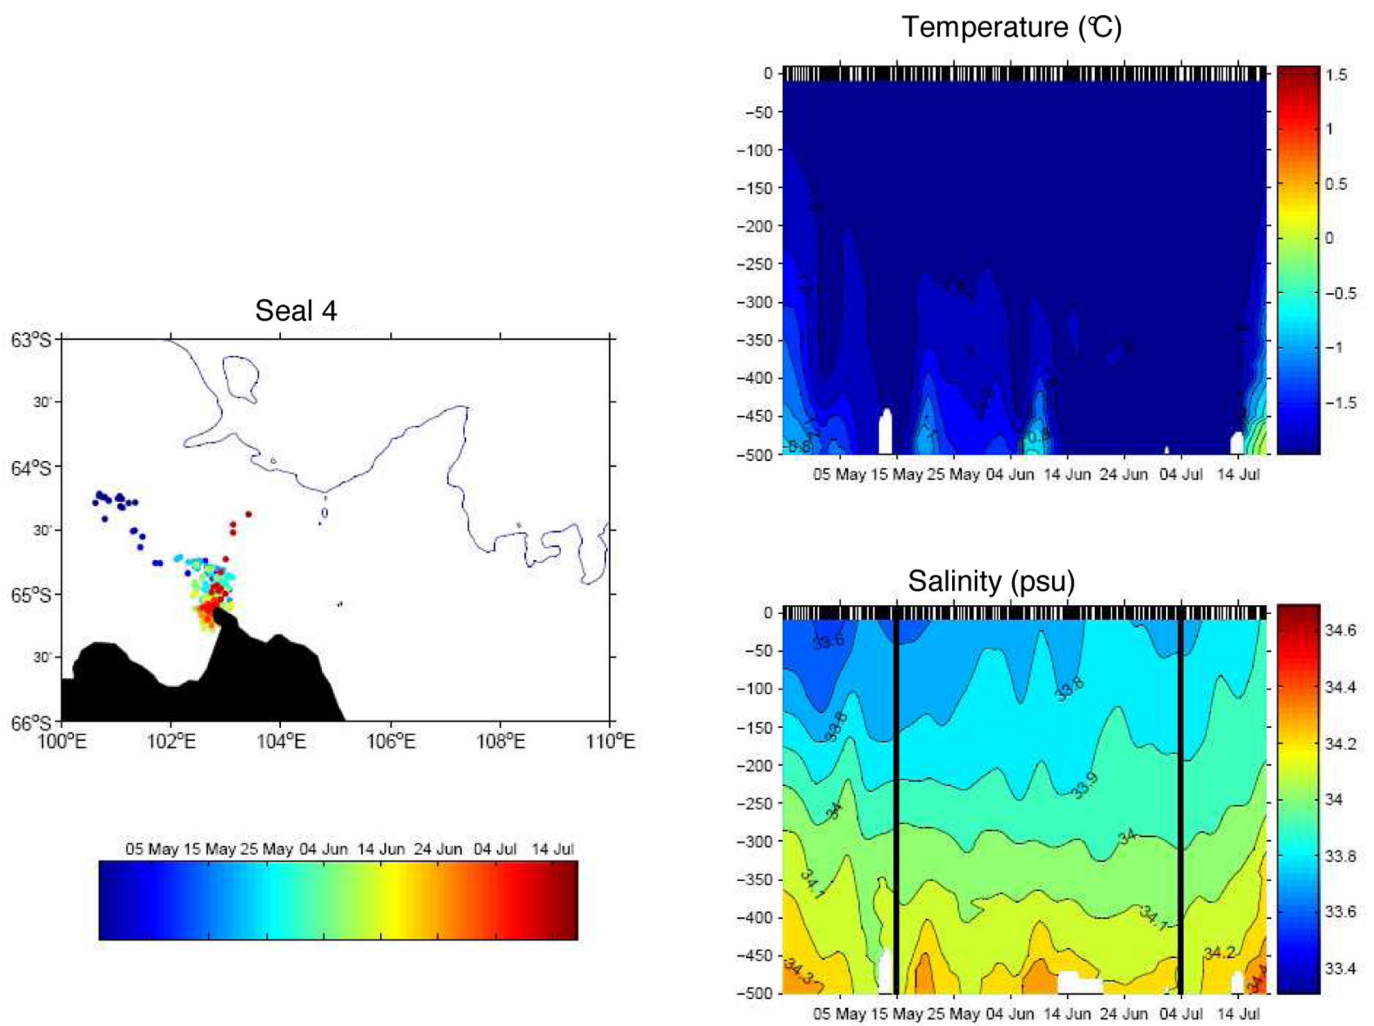

Fig. S6. T and S measured by seal 4 in May 2004 near 103°E (indicated by a green star in Fig. 1B). Tick marks on top of sections indicate the timing of individual profiles. Heavy vertical lines on salinity plot indicate the period used to calculate ice formation rates from the salinity budget.

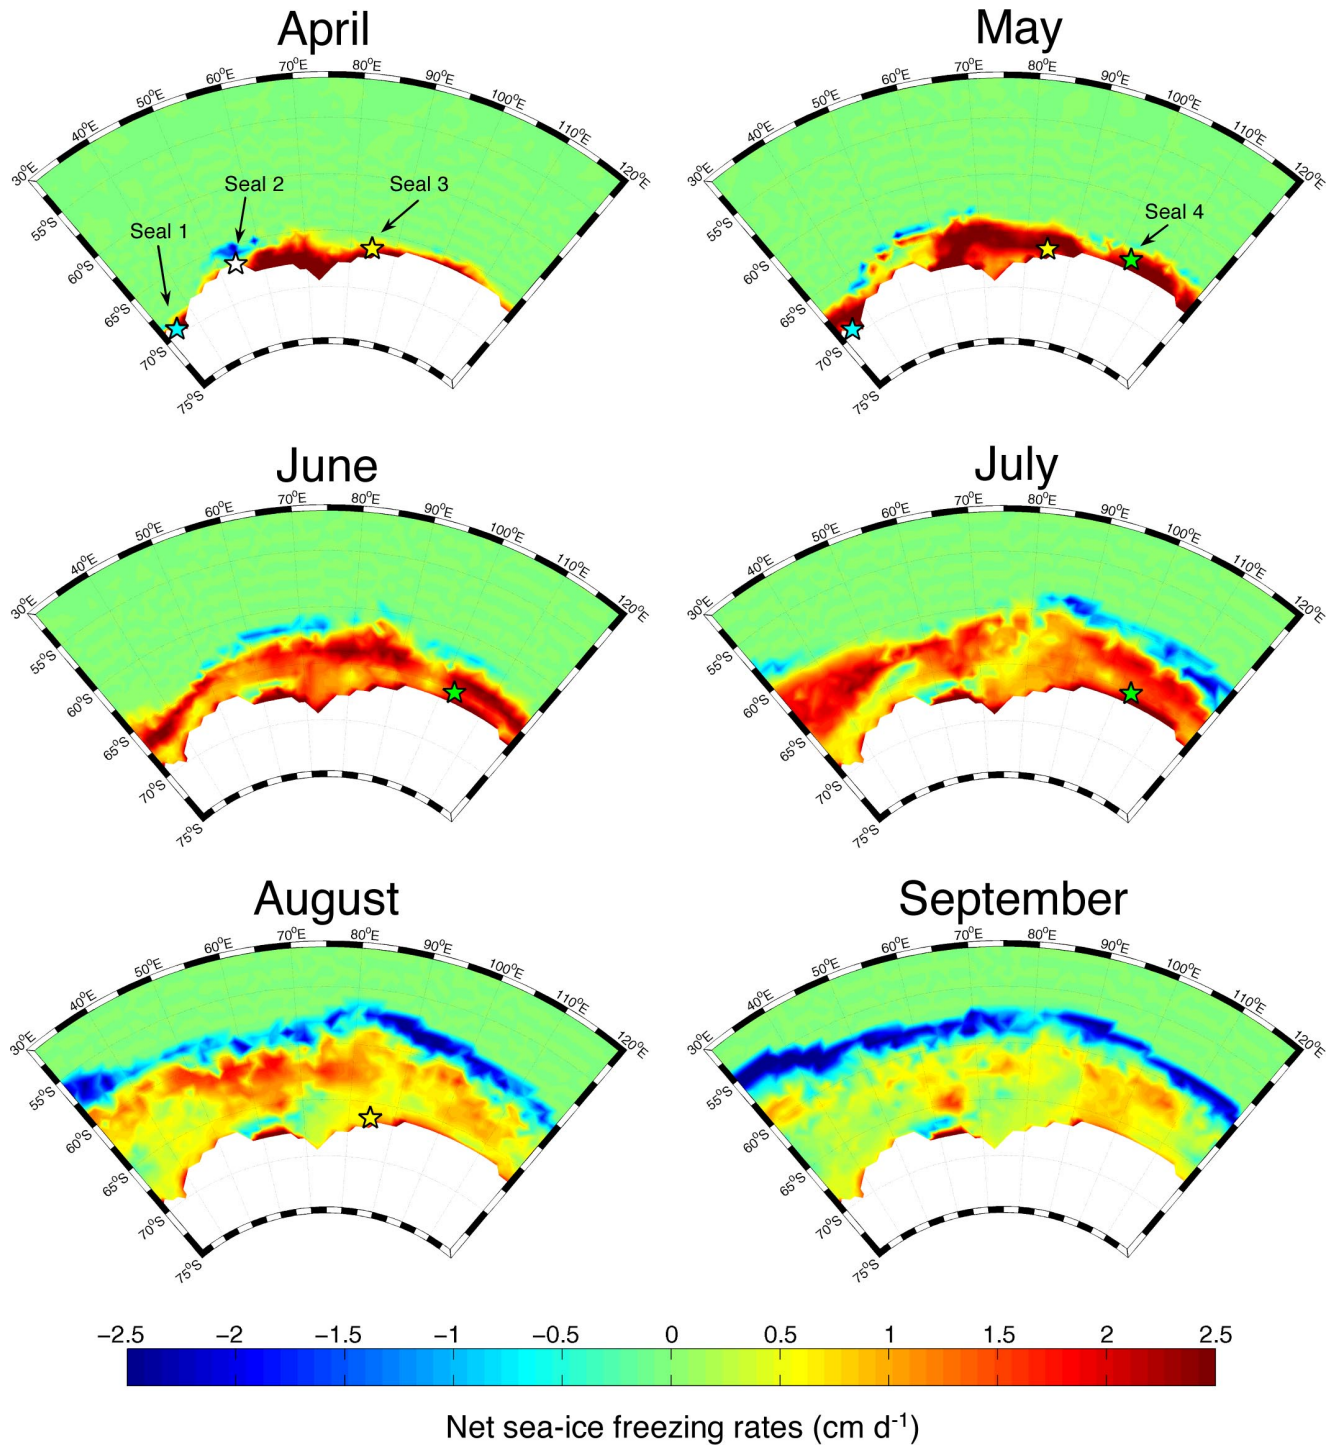

**Fig. S7.** Monthly net sea-ice growth rates (cm/d) from a finite-element coupled sea-ice ocean model (FESOM) [Timmermann R, Danilov S, Schröter JA (2006) *Geophys Res Abstr* 8:07063]. Stars indicate the positions of seal salinity time series used to calculate sea-ice formation rates (Table 1, Figs. 3 and 4, and Figs. S3–S6).

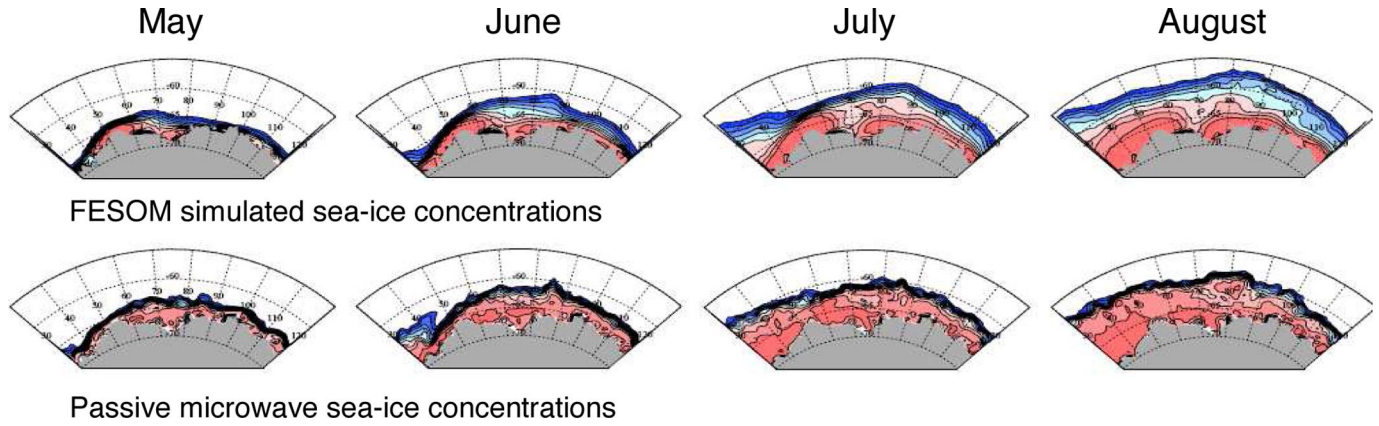

**Fig. 58.** Monthly mean ice concentrations from the FESOM [Timmermann R, Danilov S, Schröter JA (2006) *Geophys Res Abstr* 8:07063] simulation (*Upper*) and from passive microwave data [Cavalieri DJ *et al.* (1992) NASA Technical Memorandum 104559 (National Aeronautics and Space Administration, Washington, DC)] (*Lower*) for May, June, July, and August 2004. Horizontal resolution is approximately 80 km for model data and 25 km for observations. Accuracy of satellite-derived ice concentration is reported to be within 5% of the actual sea-ice concentration in winter but increases to  $\approx 10\%$  during the summer season and for ice thickness below 20 cm [Cavalieri D, Parkinson C, Gloersen P, Zwally HJ (1996, updated 2006) *Sea Ice Concentrations from Nimbus-7 SMMR and DMSP SSM/I Passive Microwave Data, May–August 2004* (National Snow and Ice Data Center, Digital media, Boulder, CO)]. Considering these uncertainties and the differences in resolution, the model simulates the seasonal growth of the sea-ice cover in good agreement with observations.



A

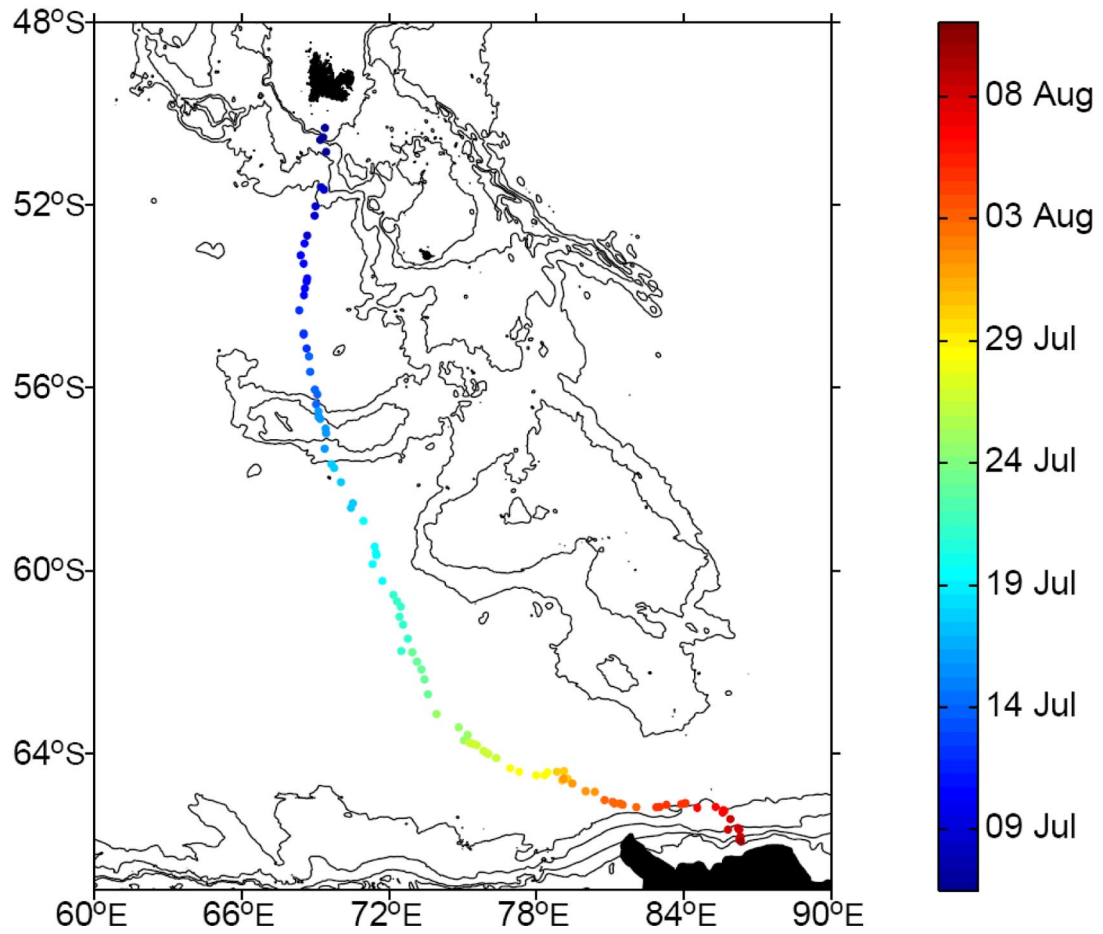

Fig. S9. Comparison of front positions along a seal section inferred using three methods. (A) positions of CTD profiles collected by seal 3 in July 2004.

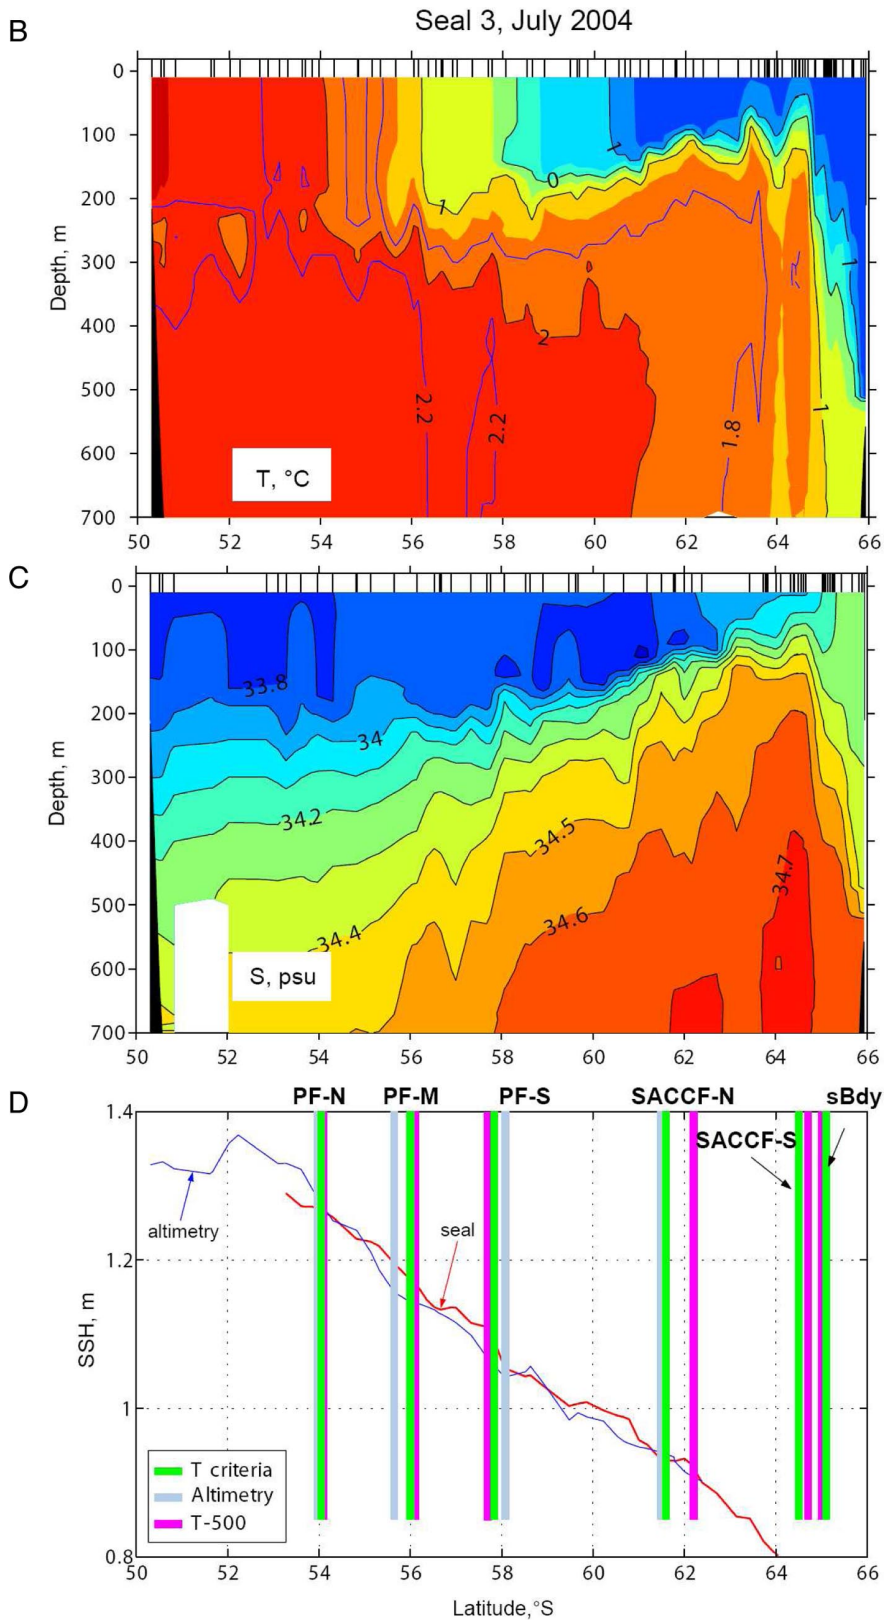

**Fig. S9 (continued).** Comparison of front positions along a seal section inferred using three methods. (B and C) Temperature (B) and salinity (C) sections from the seal data along the seal track shown in A. The positions of the measurements are indicated by black dots. (D) Altimetry-derived SSH (blue), obtained by adding SSH anomalies as measured by satellite altimetry to the mean surface dynamic height relative to 2,500 m using the WOCE climatology [Gouretski VV, Koltermann KP (2004) *WOCE Global Hydrographic Climatology* (Berichte des Bundesamt für Seeschifffahrt und Hydrographie, Germany), Technical Report 35] interpolated in space and time to the location of the seal transect, and seal-derived SSH (red), obtained by adding the seal SSH relative to 700 m to the 700–2,500 m climatological dynamic height (Gouretski and Koltermann). The positions of the fronts identified by using different criteria are shown as a function of latitude along the section: the temperature-based criteria accounting for multiple fronts (green bars; see criteria below); the altimetry-derived SSH criteria from Sokolov and Rintoul [Sokolov S, Rintoul SR (2007) *J Phys Oceanogr* 37:1394–1412] (gray bars); and the relationship between ocean temperature at 500 m and SSH (magenta bars). The three methods place the frontal branches in the following order from west to east: PF-N, PF-M, PF-S, SACCF-N, SACCF-S, and sBdy. The temperature criteria used are as follows: PF-N: T = 2.0°C in  $T_{min}$  layer; PF-M: T = 1°C in  $T_{min}$  layer; PF-S: T = 2.2°C in  $T_{max}$  layer; SACCF-N: T = 2.0°C in  $T_{max}$  layer; SACCF-S: T = 1.8°C in  $T_{max}$  layer; SB: maximum horizontal temperature gradient in the  $T_{max}$  layer in the temperature range [1–1.75]°C [Orsi *et al.* [Orsi AH, Whitworth T, Nowlin WD (1995) *Deep-Sea Res* 42:641–673] as modified in Sokolov S, Rintoul SR (2007) *J Phys Oceanogr* 37:1394–1412 and Sokolov S, Rintoul SR (2002) *J Mar Syst* 37:151–184].

**Table S1. Information on trip duration, diving behavior, and collection of temperature (T) and salinity (S) profiles for each elephant seal included in the study**

| Seal no.      | Origin            | Start        | End          | Record duration, days | Mean depth $\pm$ SD | Max. depth, m   | Total no. of T profiles | Daily T rate, per day | Total no. of S profiles | Daily S rate, per day | Total distance, km | Daily distance, km/d | Distance between two profiles, km |
|---------------|-------------------|--------------|--------------|-----------------------|---------------------|-----------------|-------------------------|-----------------------|-------------------------|-----------------------|--------------------|----------------------|-----------------------------------|
| 1             | Kerguelen Is      | 02 Mar. 2004 | 15 Jul. 2004 | 135                   | 550 $\pm$ 143       | 947             | 391                     | 2.9                   | 309                     | 2.3                   | 6,499              | 48                   | 17                                |
| 2             | Kerguelen Is      | 24 Feb. 2004 | 17 Jul. 2004 | 144                   | 667 $\pm$ 143       | 1,223           | 403                     | 2.8                   | 307                     | 2.1                   | 5,965              | 41                   | 15                                |
| 3             | Kerguelen Is      | 01 Mar. 2004 | 31 Jul. 2004 | 152                   | 510 $\pm$ 166       | 1,143           | 389                     | 2.5                   | 351                     | 2.3                   | 6,645              | 44                   | 17                                |
| 4             | Kerguelen Is      | 07 Mar. 2004 | 24 Apr. 2004 | 49                    | 693 $\pm$ 240       | 1,318           | 153                     | 3.1                   | 129                     | 2.6                   | 3,075              | 63                   | 20                                |
| 5             | Kerguelen Is      | 08 Mar. 2004 | 03 Aug. 2004 | 148                   | 576 $\pm$ 177       | 1,192           | 425                     | 2.9                   | 338                     | 2.3                   | 8,247              | 56                   | 19                                |
| 6             | Kerguelen Is      | 01 Mar. 2004 | 18 Sep. 2004 | 202                   | 546 $\pm$ 181       | 1,185           | 509                     | 2.5                   | 435                     | 2.1                   | 8,833              | 44                   | 17                                |
| 7             | Kerguelen Is      | 26 Feb. 2004 | 26 Mar. 2004 | 29                    | 810 $\pm$ 237       | 1,186           | 79                      | 2.6                   | 56                      | 1.8                   | 1,089              | 37                   | 14                                |
| 8             | Kerguelen Is      | 03 Mar. 2004 | 26 Jul. 2004 | 145                   | 563 $\pm$ 218       | 1,418           | 486                     | 3.3                   | 434                     | 3.0                   | 5,785              | 40                   | 12                                |
| 9             | Kerguelen Is      | 28 Feb. 2004 | 10 Jul. 2004 | 133                   | 614 $\pm$ 255       | 1,494           | 438                     | 3.3                   | 375                     | 2.8                   | 6,999              | 53                   | 16                                |
| 10            | Kerguelen Is      | 04 Mar. 2004 | 29 Mar. 2004 | 25                    | 549 $\pm$ 150       | 830             | 120                     | 4.6                   |                         |                       | 2,519              | 101                  | 21                                |
| 11            | Kerguelen Is      | 18 Feb. 2005 | 23 Sep. 2005 | 217                   | 607 $\pm$ 199       | 1,201           | 562                     | 2.6                   | 562                     | 2.6                   | 9,273              | 43                   | 17                                |
| 12            | Kerguelen Is      | 15 Feb. 2005 | 03 Jul. 2005 | 139                   | 546 $\pm$ 204       | 1,276           | 307                     | 2.2                   | 307                     | 2.2                   | 5,803              | 42                   | 19                                |
| 13            | Kerguelen Is      | 05 Feb. 2005 | 02 May 2005  | 86                    | 466 $\pm$ 168       | 996             | 185                     | 2.1                   | 185                     | 2.1                   | 4,855              | 56                   | 26                                |
| 14*           | Kerguelen Is      | 26 Jan. 2005 | 01 Apr. 2005 | 65                    | 424 $\pm$ 134       | 599             | 9*                      | 0.1                   | 9*                      | 0.1*                  | 2,083              | 32                   | 231*                              |
| 15            | Kerguelen Is      | 05 Feb. 2005 | 11 Mar. 2005 | 34                    | 519 $\pm$ 170       | 968             | 37                      | 1.1                   | 37                      | 1.1                   | 1,417              | 42                   | 38                                |
| 16            | Kerguelen Is      | 28 Jan. 2005 | 01 Apr. 2005 | 63                    | 617 $\pm$ 232       | 1,210           | 138                     | 2.2                   | 138                     | 2.2                   | 3,313              | 53                   | 24                                |
| 17            | Kerguelen Is      | 24 Feb. 2005 | 24 Sep. 2005 | 212                   | 608 $\pm$ 173       | 1,506           | 445                     | 2.1                   | 445                     | 2.1                   | 9,797              | 46                   | 22                                |
| 18            | Kerguelen Is      | 05 Mar. 2005 | 14 Mar. 2005 | 9                     | 503 $\pm$ 134       | 776             | 26                      | 2.5                   | 26                      | 2.5                   | 706                | 76                   | 27                                |
| 19            | Kerguelen Is      | 26 Sep. 2005 | 08 Nov. 2005 | 44                    | 623 $\pm$ 158       | 1,146           | 114                     | 2.6                   | 114                     | 2.6                   | 2,660              | 61                   | 23                                |
| 20            | Kerguelen Is      | 19 Sep. 2005 | 28 Sep. 2005 | 9                     | 777 $\pm$ 151       | 1,044           | 18                      | 1.8                   | 18                      | 1.8                   | 652                | 72                   | 36                                |
| 21            | Kerguelen Is      | 28 Sep. 2005 | 02 Nov. 2005 | 36                    | 568 $\pm$ 169       | 1,080           | 95                      | 2.6                   | 95                      | 2.6                   | 2,082              | 59                   | 22                                |
| 22            | Kerguelen Is      | 25 Sep. 2005 | 22 Nov. 2005 | 59                    | 655 $\pm$ 197       | 1,248           | 169                     | 2.8                   | 169                     | 2.8                   | 2,528              | 43                   | 15                                |
| 23            | South Shetland Is | 23 Feb. 2005 | 10 Oct. 2005 | 229                   | 564 $\pm$ 257       | 1,694           | 466                     | 2.0                   | 466                     | 2.0                   | 7,798              | 34                   | 17                                |
| 24            | South Shetland Is | 05 Mar. 2005 | 07 Oct. 2005 | 216                   | 490 $\pm$ 149       | 1,104           | 392                     | 1.8                   | 392                     | 1.8                   | 13,667             | 63                   | 35                                |
| 25            | South Shetland Is | 27 May 2005  | 08 Oct. 2005 | 134                   | 467 $\pm$ 119       | 1,014           | 351                     | 2.6                   | 351                     | 2.6                   | 4,389              | 33                   | 13                                |
| 26            | South Shetland Is | 21 Feb. 2005 | 22 Nov. 2005 | 275                   | 607 $\pm$ 307       | 1,386           | 358                     | 1.3                   | 358                     | 1.3                   | 7,025              | 26                   | 20                                |
| 27            | South Shetland Is | 23 Feb. 2005 | 30 Oct. 2005 | 250                   | 516 $\pm$ 181       | 1,134           | 443                     | 1.8                   | 443                     | 1.8                   | 8,655              | 35                   | 20                                |
| 28            | South Shetland Is | 27 May 2005  | 19 Nov. 2005 | 176                   | 589 $\pm$ 209       | 1,320           | 307                     | 1.7                   | 307                     | 1.7                   | 7,234              | 41                   | 24                                |
| 29            | South Georgia     | 03 Feb. 2004 | 03 May 2004  | 90                    | 565 $\pm$ 187       | 1,028           | 162                     | 1.8                   | 162                     | 1.8                   | 5,053              | 56                   | 31                                |
| 30            | South Georgia     | 03 Feb. 2004 | 23 May 2004  | 110                   | 576 $\pm$ 202       | 1,028           | 156                     | 1.4                   | 156                     | 1.4                   | 4,990              | 45                   | 32                                |
| 31            | South Georgia     | 07 Feb. 2004 | 15 Feb. 2004 | 8                     | 572 $\pm$ 202       | 909             | 29                      | 3.1                   | 29                      | 3.1                   | 543                | 66                   | 19                                |
| 32            | South Georgia     | 14 Feb. 2004 | 19 Aug. 2004 | 188                   | 618 $\pm$ 198       | 1,028           | 305                     | 1.6                   | 305                     | 1.6                   | 7,131              | 38                   | 23                                |
| 33            | South Georgia     | 15 Feb. 2004 | 06 Jul. 2004 | 142                   | 592 $\pm$ 238       | 1,117           | 207                     | 1.5                   | 207                     | 1.5                   | 6,351              | 45                   | 31                                |
| 34            | South Georgia     | 18 Feb. 2004 | 25 Aug. 2004 | 189                   | 513 $\pm$ 175       | 969             | 222                     | 1.2                   | 222                     | 1.2                   | 6,589              | 35                   | 30                                |
| 35            | South Georgia     | 12 Feb. 2005 | 28 Apr. 2005 | 105                   | 475 $\pm$ 165       | 946             | 95                      | 0.9                   | 95                      | 0.9                   | 6,718              | 64                   | 71                                |
| 36            | South Georgia     | 26 Feb. 2005 | 19 Oct. 2005 | 235                   | 522 $\pm$ 165       | 1,428           | 573                     | 2.4                   | 573                     | 2.4                   | 11,373             | 48                   | 20                                |
| 37            | South Georgia     | 14 Feb. 2005 | 23 Nov. 2005 | 282                   | 447 $\pm$ 168       | 986             | 235                     | 0.8                   | 235                     | 0.8                   | 9,776              | 35                   | 42                                |
| 38            | South Georgia     | 10 Feb. 2005 | 14 Sep. 2005 | 217                   | 546 $\pm$ 248       | 1,404           | 531                     | 2.4                   | 531                     | 2.4                   | 12,547             | 58                   | 24                                |
| 39            | South Georgia     | 30 Jan. 2005 | 19 Sep. 2005 | 232                   | 843 $\pm$ 438       | 1,998           | 411                     | 1.8                   | 411                     | 1.8                   | 12,817             | 55                   | 31                                |
| 40            | South Georgia     | 26 Jan. 2005 | 03 Jul. 2005 | 168                   | 498 $\pm$ 186       | 1,010           | 145                     | 0.9                   | 145                     | 0.9                   | 10,273             | 61                   | 71                                |
| 41            | South Georgia     | 08 Feb. 2005 | 13 Nov. 2005 | 278                   | 481 $\pm$ 173       | 1,032           | 343                     | 1.2                   | 343                     | 1.2                   | 12,104             | 43                   | 35                                |
| 42            | South Georgia     | 07 Feb. 2005 | 06 Jun. 2005 | 119                   | 557 $\pm$ 190       | 950             | 235                     | 2.0                   | 235                     | 2.0                   | 4,356              | 37                   | 19                                |
| 43            | South Georgia     | 25 Jan. 2005 | 09 Apr. 2005 | 104                   | 407 $\pm$ 109       | 894             | 295                     | 2.8                   | 295                     | 2.8                   | 6,055              | 58                   | 21                                |
| 44            | South Georgia     | 27 Jan. 2005 | 07 Oct. 2005 | 253                   | 802 $\pm$ 378       | 1,758           | 393                     | 1.5                   | 393                     | 1.5                   | 16,288             | 64                   | 41                                |
| 45            | South Georgia     | 11 Feb. 2005 | 13 Sep. 2005 | 214                   | 566 $\pm$ 227       | 1,550           | 399                     | 1.9                   | 399                     | 1.9                   | 10,206             | 48                   | 26                                |
| 46            | Macquarie Is      | 18 Feb. 2004 | 20 Jul. 2004 | 153                   | 561 $\pm$ 159       | 1,085           | 358                     | 2.3                   | 358                     | 2.3                   | 5,124              | 33                   | 14                                |
| 47            | Macquarie Is      | 06 Feb. 2004 | 08 Jul. 2004 | 153                   | 542 $\pm$ 119       | 861             | 408                     | 2.6                   | 408                     | 2.6                   | 5,892              | 38                   | 14                                |
| 48            | Macquarie Is      | 27 Jan. 2004 | 20 Jun. 2004 | 145                   | 526 $\pm$ 130       | 999             | 324                     | 2.2                   | 324                     | 2.2                   | 6,423              | 44                   | 20                                |
| 49            | Macquarie Is      | 31 Jan. 2004 | 25 Jul. 2004 | 176                   | 472 $\pm$ 195       | 1,028           | 350                     | 2.0                   | 350                     | 2.0                   | 6,913              | 39                   | 20                                |
| 50            | Macquarie Is      | 12 Feb. 2005 | 28 Apr. 2005 | 76                    | 495 $\pm$ 161       | 906             | 179                     | 2.3                   | 179                     | 2.3                   | 3,521              | 47                   | 20                                |
| 51            | Macquarie Is      | 09 Feb. 2005 | 10 Apr. 2005 | 60                    | 491 $\pm$ 189       | 1,002           | 122                     | 2.0                   | 122                     | 2.0                   | 2,561              | 42                   | 21                                |
| 52            | Macquarie Is      | 01 Feb. 2005 | 02 Sep. 2005 | 213                   | 476 $\pm$ 183       | 1,678           | 380                     | 1.8                   | 380                     | 1.8                   | 9,960              | 47                   | 26                                |
| 53            | Macquarie Is      | 04 Feb. 2005 | 21 Sep. 2005 | 229                   | 639 $\pm$ 252       | 1,404           | 451                     | 2.0                   | 451                     | 2.0                   | 9,675              | 42                   | 21                                |
| 54            | Macquarie Is      | 19 Feb. 2005 | 13 Mar. 2005 | 23                    | 507 $\pm$ 134       | 966             | 69                      | 2.9                   | 69                      | 2.9                   | 2,293              | 101                  | 33                                |
| 55            | Macquarie Is      | 01 Feb. 2005 | 28 Aug. 2005 | 208                   | 560 $\pm$ 192       | 1,146           | 412                     | 2.0                   | 412                     | 2.0                   | 7,227              | 35                   | 18                                |
| 56            | Macquarie Is      | 14 Feb. 2005 | 03 Jul. 2005 | 167                   | 627 $\pm$ 183       | 1,606           | 328                     | 2.0                   | 328                     | 2.0                   | 8,212              | 49                   | 25                                |
| 57            | Macquarie Is      | 14 Feb. 2005 | 05 Oct. 2005 | 233                   | 540 $\pm$ 188       | 1,314           | 250                     | 1.1                   | 250                     | 1.1                   | 5,800              | 25                   | 23                                |
| 58            | Macquarie Is      | 12 Feb. 2005 | 17 Sep. 2005 | 218                   | 598 $\pm$ 193       | 1,236           | 325                     | 1.5                   | 325                     | 1.5                   | 8,821              | 41                   | 27                                |
| Mean $\pm$ SD |                   |              |              | 145 $\pm$ 78          | 566 $\pm$ 89        | 1,171 $\pm$ 264 | 289 $\pm$ 151           | 2.1 $\pm$ 0.8         | 283 $\pm$ 145           | 2.0 $\pm$ 0.6         | 6,469 $\pm$ 3533   | 49 $\pm$ 15          | 25 $\pm$ 11                       |

\*Technical failure after a few days at sea so values not included in the mean.
